# Supplementary material for: Mutant LRRK2 in lymphocytes regulates neurodegeneration via IL-6 in an inflammatory model of Parkinson’s disease
Source: PubMed Central journal article supplement (PMC8924242; doi:10.1038/s41531-022-00289-9), 2022-03-15
Supplement: 41531_2022_289_MOESM1_ESM.pdf [file 41531_2022_289_MOESM1_ESM.pdf]

**Mutant LRRK2 in lymphocytes regulates neurodegeneration via IL-6 in an  
inflammatory model of Parkinson's disease**

Elena Kozina<sup>1</sup>, Matthew Byrne<sup>1</sup>, Richard Jay Smeyne<sup>1\*</sup>

<sup>1</sup>Department of Neurosciences, Jefferson Hospital for Neuroscience, Thomas Jefferson University, 900 Walnut St, Philadelphia PA 19107.

**Running title:** Immune system primacy in LRRK2-mediated Parkinson's disease

**Keywords:** LRRK2, Parkinson's disease, B cells, T cells, immune system, bone marrow transplant

\*Corresponding author.

Richard Jay Smeyne, Ph.D.  
Department of Neuroscience  
Jefferson Comprehensive Parkinson's Disease Center  
Thomas Jefferson University  
900 Walnut Street  
Philadelphia PA 19107  
215-955-8634 (office)  
ORCHD ID: 0000-0002-8459-5472  
**Email:** [Richard.smeyne@jefferson.edu](mailto:Richard.smeyne@jefferson.edu)

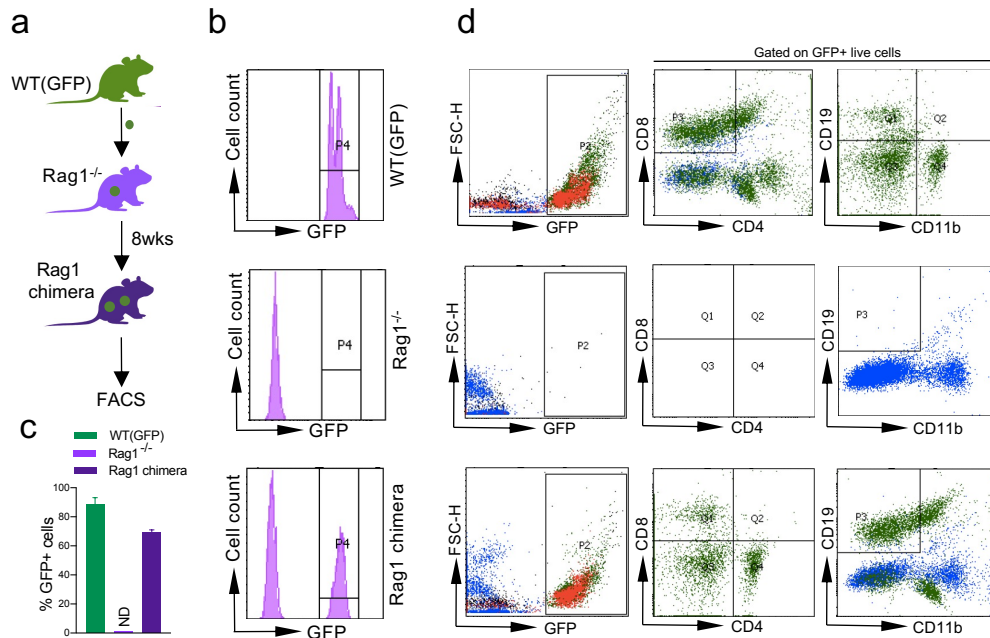

**Supplementary Figure 1. Peripheral blood lymphoid chimerism in Rag1<sup>-/-</sup> mice 8 weeks post-BM transplantation.** (a) Schematic representation of BMT experiment. Recipient Rag1<sup>-/-</sup> mice lacking B- and T-cells were injected with donor GFP<sup>+/+</sup> BM cells and analyzed for chimerism 8 weeks post-BMT. (b) Representative flow cytometry analysis of the frequency of donor-derived GFP<sup>+</sup> cells in reconstituted chimeras. Donor GFP<sup>+/+</sup> and non-transplanted Rag1<sup>-/-</sup> mice were served as positive and negative controls, respectively. (c) Quantification of the percentage of GFP<sup>+</sup> cells (% of total live cells) in the blood of transplanted mice shows sufficient reconstitution level of donor cells. Data are mean ± SEM, n=3 for each group. (d) Gating strategy for FACS analysis of PBMCs from BM-transplanted chimera mice. After eliminating debris/dead cells and doublet cells by forward- and side-scatter, cells were gated based on CD4 (PerCP-Cy5.5), CD8 (PE-Cy7), CD19 (APC-Cy7), CD11b (Alexa700) fluorescent intensity. Positive and negative gates were drawn based on the intensity of an unstained control sample.

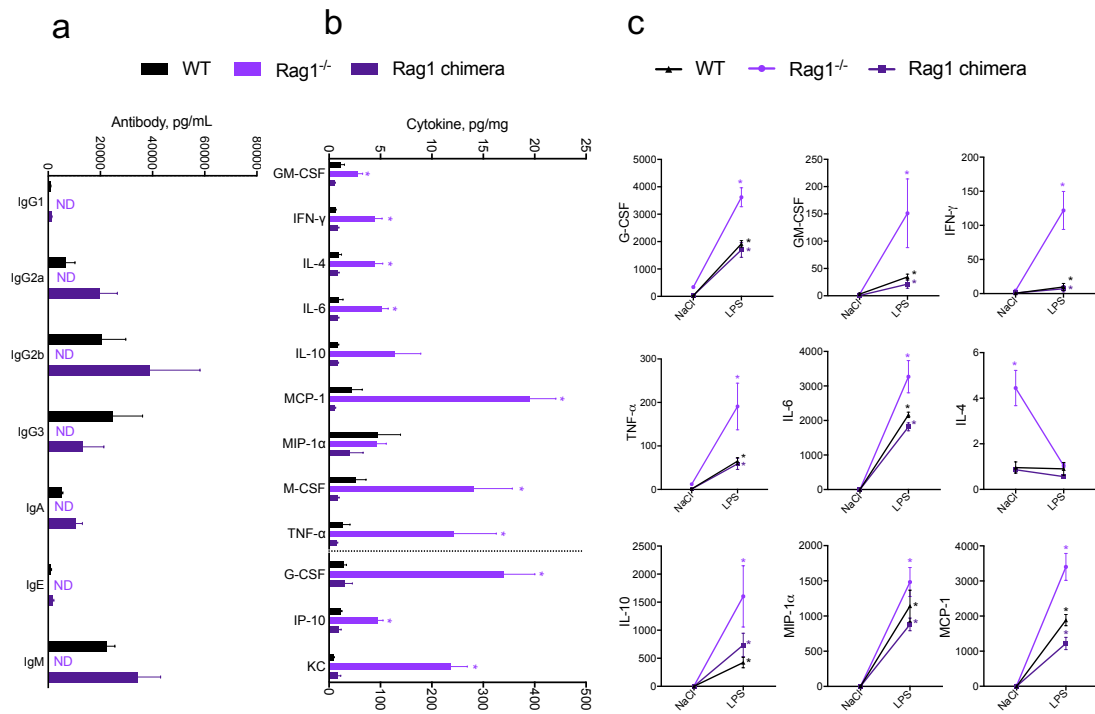

**Supplementary Figure 2. Rescued immunodeficiency in Rag1 BM-transplanted chimeras.** (a) Antibody deficiency seen in Rag1<sup>-/-</sup> recipient mice is completely restored in transplanted chimeras. (b) Baseline serum cytokine expression and LPS-induced cytokine response (c) are back to WT level in BM-reconstituted chimeras compared to non-transplanted Rag1<sup>-/-</sup> mice. Data are mean  $\pm$  SEM, n=6 for each group. \* $p$ <0.05 vs. WT controls in B; \* $p$ <0.05 vs. NaCl controls in (c). ND, not detectable.

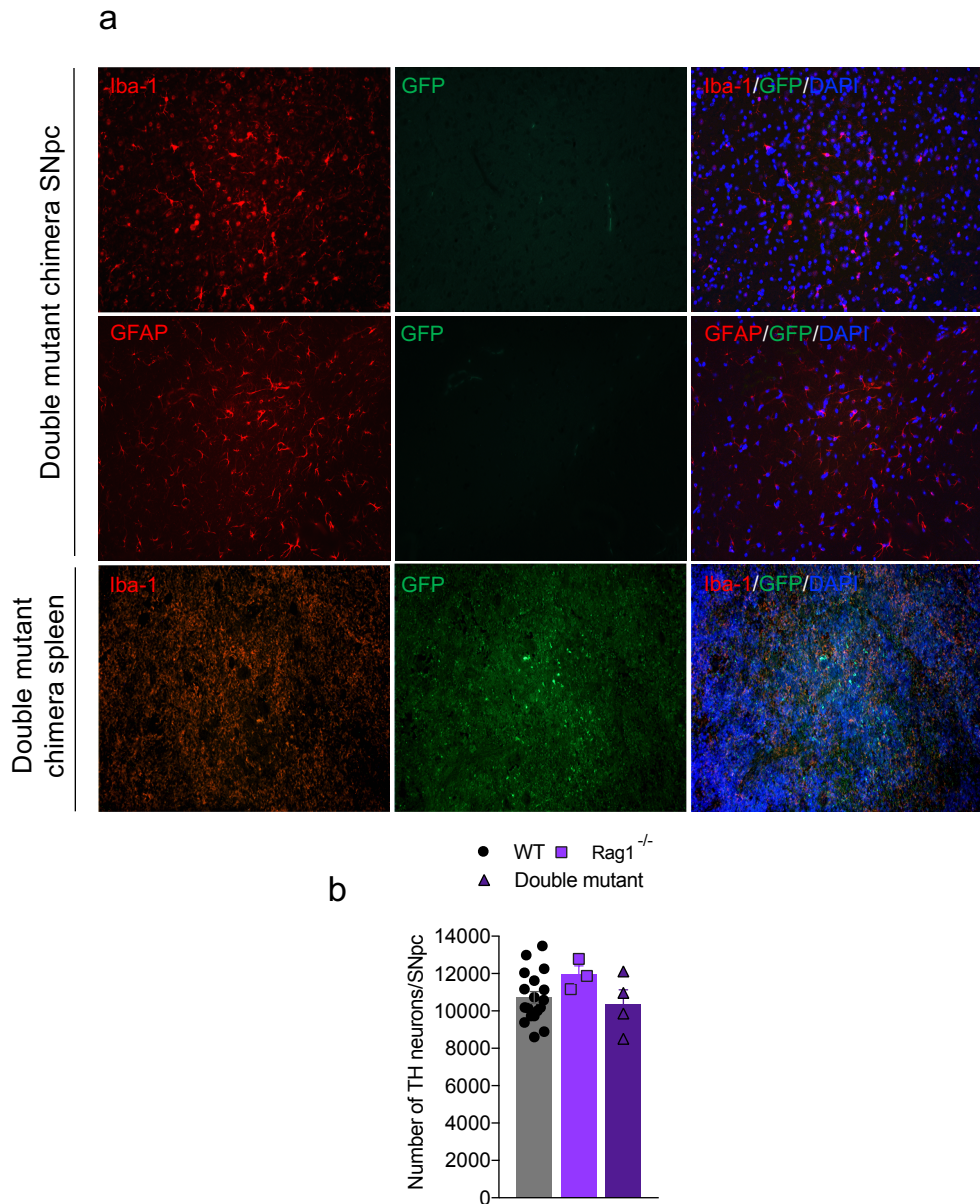

**Supplementary Figure 3. Double mutant chimera's CNS remains of host origin and does not display any histopathological changes.** (a) Donor-derived bone marrow cells do not colonize the brains of double mutant chimeras. Immunohistochemistry of chimeric brains shows Iba-1+/GFP- and GFAP+/GFP- cells in the SN of non-treated (not shown) and LPS-treated (a) double mutant chimeric mice 8-10 weeks after BMT. Bars = 200  $\mu$ m. Iba-1 stained spleen sections from double mutant chimeras were used as a positive control of peripheral engraftment. (b) Lack of DA cell loss in the SNpc of non-treated  $Rag1^{-/-}$  and double mutant chimeras. Data are mean  $\pm$  SEM,  $n \geq 3$  for each group.



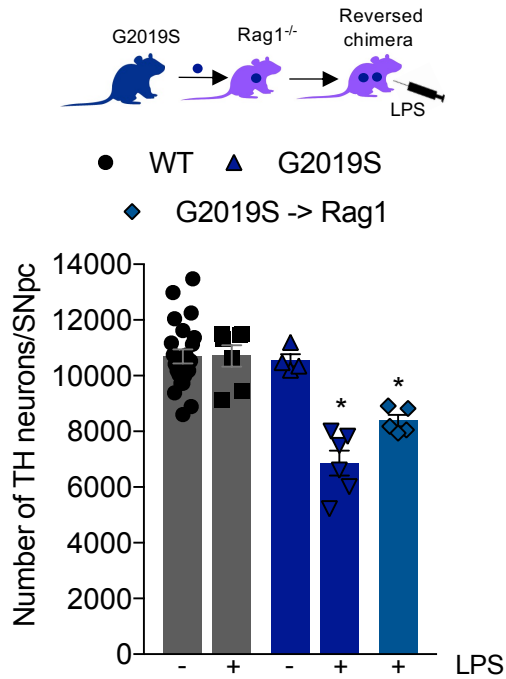

**Supplementary Figure 4.** Reversed chimeras expressing mutant G2019S LRRK2 in adaptive immune cells only also develop SNpc TH cell loss 7 days after LPS treatment similar to LPS-treated parental G2019S mice. Data are mean  $\pm$  SEM,  $n \geq 5$ . \* $p < 0.05$  vs non-treated G2019S.
